# Supplementary material for: Synthesis and structural design of microspheres comprising cellulose nanofibers and artificial lignin polymer by enzyme-mediated Pickering emulsion templating
Source: Royal Society of Chemistry journal article supplement (doi:10.1039/d4su00067f), 2024-01-01
Supplement: d4su00067f1.pdf [file d4su00067f1.pdf]

## Supporting Information

### **Synthesis and structural design of microspheres comprising cellulose nanofibers and artificial lignin polymer by enzyme-mediated Pickering emulsion templating**

*Yuna Tanaka<sup>1,†</sup>, Qi Li<sup>1,†</sup>, Mayumi Hatakeyama<sup>1</sup>, Takuya Kitaoka<sup>1,\*</sup>*

<sup>1</sup> Department of Agro-Environmental Sciences, Graduate School of Bioresource and Bioenvironmental Sciences, Kyushu University, Fukuoka 819-0395, Japan

\* Corresponding author, E-mail: tkitaoka@agr.kyushu-u.ac.jp (T. Kitaoka)

† These authors contributed equally to this work.

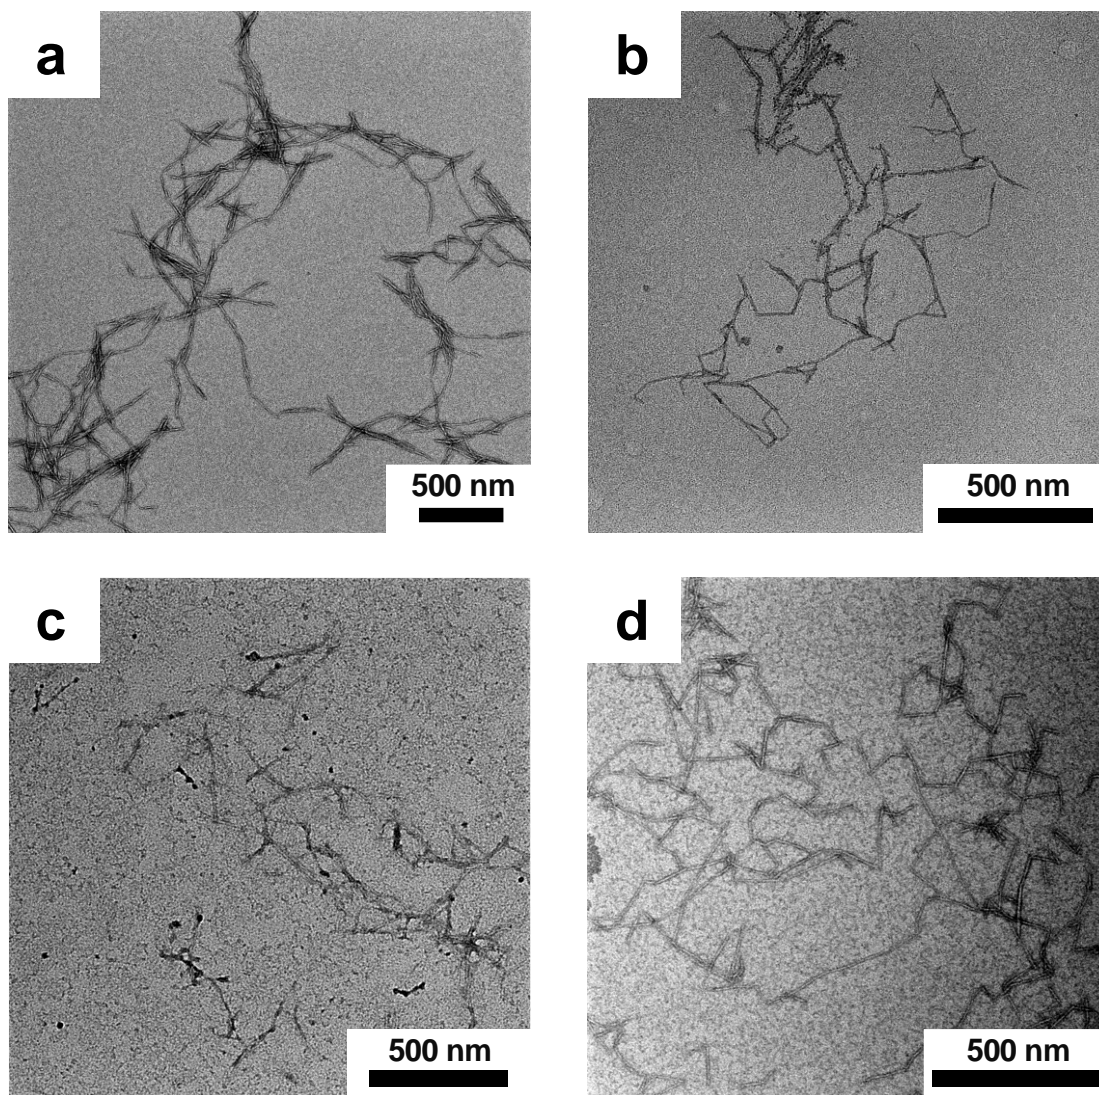

**Figure S1** TEM images of a) CNF, b) TOCNF, c) S-CNF, and d) P-CNF. (TEM = transmission electron microscopy; CNF = cellulose nanofiber; TOCNF = 2,2,6,6-tetramethylpiperidine-1-oxyl (TEMPO)-oxidized CNF; S-CNF = sulfated CNF; P-CNF = phosphorylated CNF).

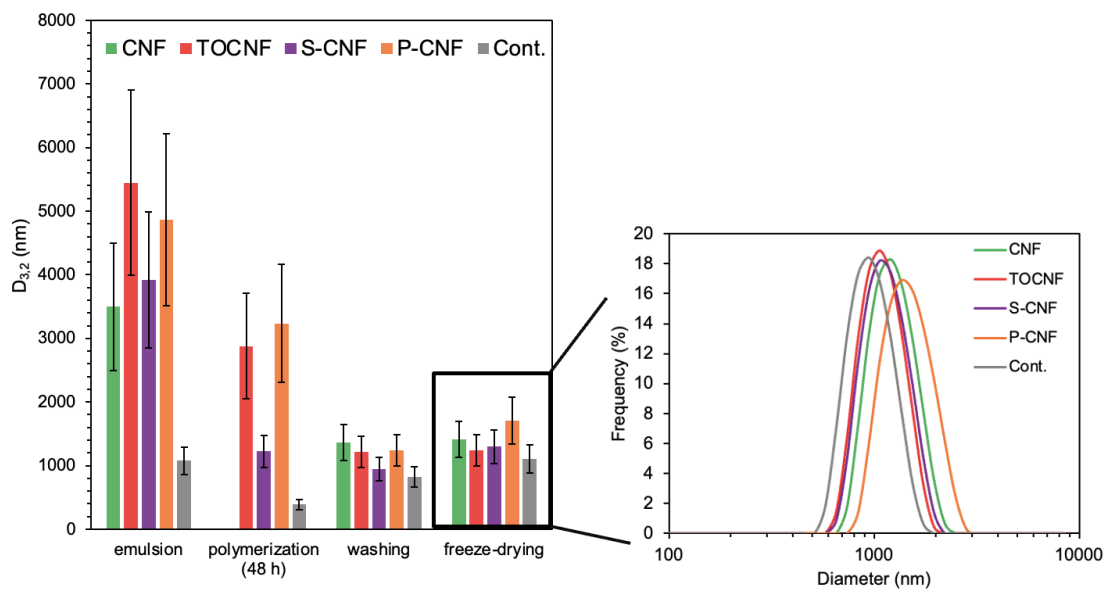

**Figure S2** Sauter mean diameters of emulsion and microparticles of ALP/CNFs at each step. (ALP = artificial lignin polymer; CNF = cellulose nanofiber; TOCNF = 2,2,6,6-tetramethylpiperidine-1-oxyl (TEMPO)-oxidized CNF; S-CNF = sulfated CNF; P-CNF = phosphorylated CNF; Cont.: ALP without CNFs).

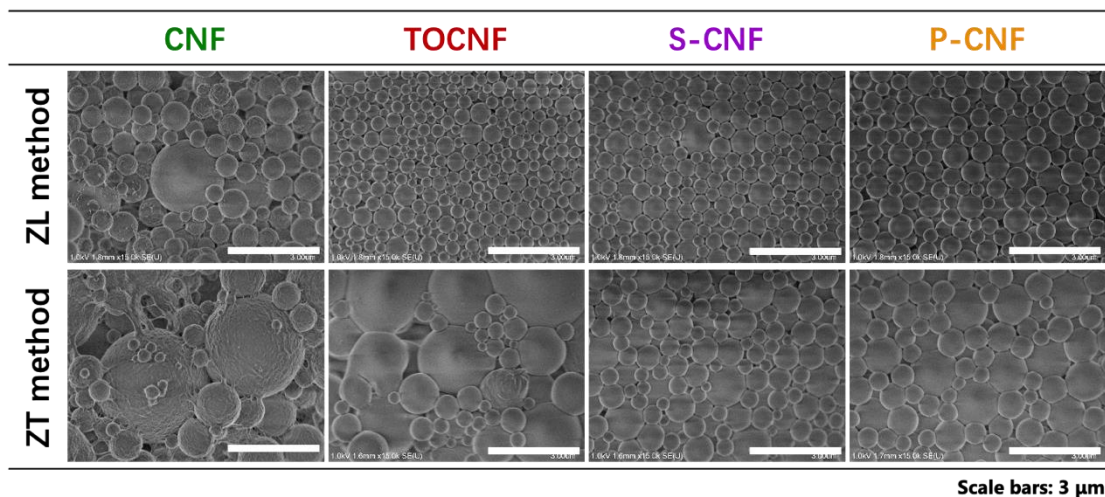

**Figure S3** SEM images of ALP/CNF microparticles synthesized by the “bulk” and “stepwise” polymerization, which refer to Zulaufverfahren (ZL) and Zutropfverfahren (ZT) methods, respectively. (SEM = scanning electron microscopy; ALP = artificial lignin polymer; CNF = cellulose nanofiber; TOCNF = 2,2,6,6-tetramethylpiperidine-1-oxyl (TEMPO)-oxidized CNF; S-CNF = sulfated CNF; P-CNF = phosphorylated CNF).

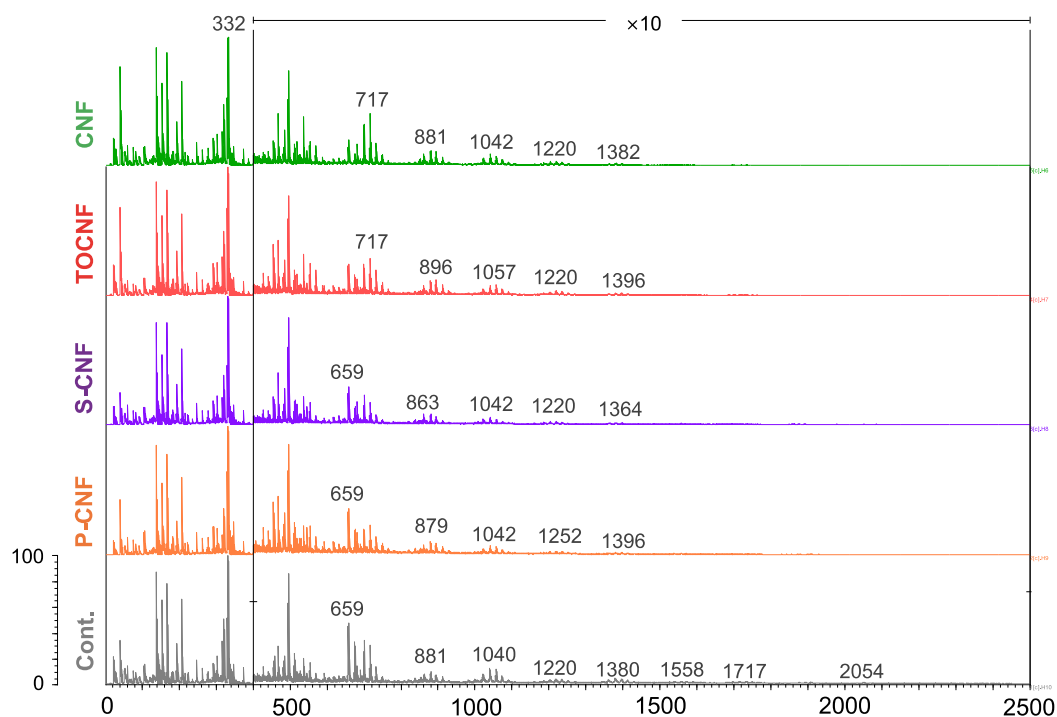

**Figure S4** MALDI TOF-MS spectra of ALP/CNFs. Matrix: 2,5-dihydroxybenzoic acid (DHB). (MALDI TOF-MS = matrix-assisted laser desorption/ionization–time-of-flight mass spectrometry; ALP = artificial lignin polymer; CNF = cellulose nanofiber; TOCNF = 2,2,6,6-tetramethylpiperidine-1-oxyl (TEMPO)-oxidized CNF; S-CNF = sulfated CNF; P-CNF = phosphorylated CNF; Cont.: ALP without CNFs).

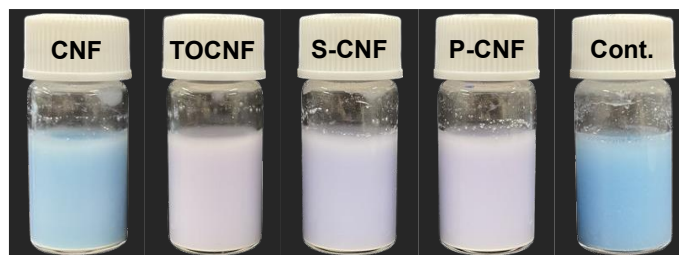

**Figure S5** Metachromatic color change of the aqueous dispersions of ALP/CNFs with  $0.01 \text{ mg mL}^{-1}$  TBO (toluidine blue O). (ALP = artificial lignin polymer; CNF = cellulose nanofiber; TOCNF = 2,2,6,6-tetramethylpiperidine-1-oxyl (TEMPO)-oxidized CNF; S-CNF = sulfated CNF; P-CNF = phosphorylated CNF; Cont.: ALP without CNFs).

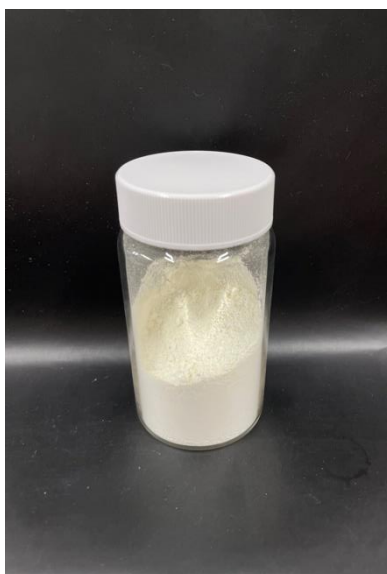

**Figure S6** Digital image of ALP/CNF microparticles. (ALP = artificial lignin polymer; CNF = cellulose nanofiber).

**Table S1** Description of the sample for SPF determination. (SPF = sun protection factor).

| Raw materials |                      | Constituents                                                                      | Content %   |
|---------------|----------------------|-----------------------------------------------------------------------------------|-------------|
|               | Purified water       | Water                                                                             | 50.66       |
|               | BG                   | 1,3-BG                                                                            | 5.00        |
| A             | Glycerin             | Glycerin                                                                          | 1.00        |
|               | EDTA-2Na             | EDTA-2Na                                                                          | 0.04        |
|               | Phenoxyethanol       | Phenoxyethanol                                                                    | 0.30        |
| B1            | BENTONE GEL ISD V    | Isododecane, Disteardimonium Hectorite, Propylene carbonate                       | 2.00        |
|               | IPM-100              | Isopropyl myristate                                                               | 8.00        |
| B2            | Uvinul MC80          | Ethylhexyl methoxycinnamate                                                       | 3.00        |
|               | KF-6038              | Lauryl PEG-9 Polydimethylsiloxylethyl Dimethicone                                 | 1.00        |
| B3            | KF-995               | Cyclopentasiloxane                                                                | 5.00        |
|               | KSG-16               | Dimethicone/Vinyl Dimethicone Crosspolymer, Dimethicone                           | 4.00        |
| C             | DIS-11A              | Titanium oxide, hydroxylated Al, Silica, Hydrogen Dimethicone, Cyclopentasiloxane | 10.00       |
|               | DIF-3ST2             | Zinc oxide, Silica, Hydrogen Dimethicone, Cyclopentasiloxane                      | 5.00        |
| D             | <b>Powder sample</b> | <b>Microparticles</b>                                                             | <b>5.00</b> |
|               |                      |                                                                                   | Total       |
|               |                      |                                                                                   | 100         |

The sample preparation method was as follows: (1) component A was weighed and dissolved; (2) components B1, B2, and B3 were weighed and dispersed; (3) component C was weighed, added to component B mixture, and dispersed; (4) component D was weighed and added to components B + C and stirred; and (5) component A was added to components B + C + D and dispersed (2400 rpm, 30 s).
